# Supplementary material for: Inpatient Outcomes of Patients Undergoing Robot-Assisted versus Laparoscopic Radical Cystectomy for Bladder Cancer: A National Inpatient Sample Database Study
Source: MDPI journal article supplement (doi:10.3390/jcm13030772), 2024-01-29
Supplement: s1 [file s1]

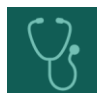

Supplementary Table S1. The relationship between different operations and outcomes.

| Characteristic                           | In-hospital mortality     |                           | Prolonged LOS <sup>a, b</sup> |                          |
|------------------------------------------|---------------------------|---------------------------|-------------------------------|--------------------------|
|                                          | Univariate                | Multivariate              | Univariate                    | Multivariate             |
|                                          | OR (95% CI)               | aOR (95% CI)              | OR (95% CI)                   | aOR (95% CI)             |
| <b>Operation</b>                         |                           |                           |                               |                          |
| Laparoscopic                             | ref                       | ref                       | ref                           | ref                      |
| Robot-assisted                           | <b>0.43 (0.23, 0.78)</b>  | <b>0.50 (0.28, 0.90)</b>  | <b>0.68 (0.53, 0.86)</b>      | <b>0.63 (0.49, 0.80)</b> |
| <b>Age</b>                               |                           |                           |                               |                          |
| 50-59                                    | ref                       | ref                       | ref                           |                          |
| 60-69                                    | 0.93 (0.33, 2.60)         | 0.91 (0.28, 2.99)         | 0.91 (0.72, 1.14)             | 0.85 (0.67, 1.07)        |
| 70-79                                    | 1.75 (0.67, 4.57)         | 1.40 (0.45, 4.30)         | 1.16 (0.92, 1.46)             | 0.99 (0.76, 1.28)        |
| 80+                                      | <b>3.29 (1.19, 9.09)</b>  | 2.44 (0.73, 8.14)         | <b>1.55 (1.20, 2.01)</b>      | 1.27 (0.95, 1.71)        |
| <b>Gender</b>                            |                           |                           |                               |                          |
| Male                                     | 1.56 (0.76, 3.20)         |                           | 0.99 (0.82, 1.18)             |                          |
| Female                                   | ref                       |                           | ref                           |                          |
| <b>Race</b>                              |                           |                           |                               |                          |
| White                                    | ref                       | ref                       | ref                           | ref                      |
| Black                                    | <b>2.50 (1.14, 5.49)</b>  | <b>2.33 (1.05, 5.13)</b>  | <b>1.40 (1.01, 1.95)</b>      |                          |
| Hispanic                                 | <b>2.68 (1.07, 6.72)</b>  | 2.57 (0.97, 6.86)         | 1.14 (0.77, 1.70)             |                          |
| Others                                   | 1.38 (0.43, 4.42)         | 1.62 (0.50, 5.23)         | 0.87 (0.60, 1.25)             |                          |
| <b>Household income</b>                  |                           |                           |                               |                          |
| Quartile1                                | 1.55 (0.73, 3.26)         |                           | 0.86 (0.69, 1.08)             |                          |
| Quartile2                                | 1.26 (0.59, 2.70)         |                           | 0.97 (0.80, 1.17)             |                          |
| Quartile3                                | 1.36 (0.68, 2.74)         |                           | 0.90 (0.73, 1.11)             |                          |
| Quartile4                                | ref                       |                           | ref                           |                          |
| <b>Insurance status</b>                  |                           |                           |                               |                          |
| Medicare/Medicaid                        | ref                       |                           | ref                           | ref                      |
| Private including HMO                    | 0.58 (0.29, 1.16)         |                           | <b>0.79 (0.67, 0.93)</b>      | 0.93 (0.76, 1.12)        |
| Self-pay/no-charge/other                 | 2.32 (0.81, 6.62)         |                           | 0.66 (0.42, 1.02)             | 0.70 (0.44, 1.11)        |
| <b>CCI</b>                               |                           |                           |                               |                          |
| 0-1                                      | NA                        | NA                        | NA                            | NA                       |
| 2-3                                      | ref                       | ref                       | ref                           | ref                      |
| 4-5                                      | <b>3.35 (1.87, 6.00)</b>  | <b>2.64 (1.43, 4.88)</b>  | <b>1.61 (1.35, 1.92)</b>      | <b>1.59 (1.32, 1.90)</b> |
| 6+                                       | <b>6.78 (3.53, 13.02)</b> | <b>5.61 (2.85, 11.06)</b> | <b>1.86 (1.43, 2.43)</b>      | <b>1.89 (1.44, 2.48)</b> |
| <b>Hospital bed size</b>                 |                           |                           |                               |                          |
| Large                                    | ref                       |                           | ref                           |                          |
| Medium                                   | 1.34 (0.77, 2.34)         |                           | 0.98 (0.80, 1.18)             |                          |
| Small                                    | 0.81 (0.35, 1.90)         |                           | 0.78 (0.60, 1.03)             |                          |
| <b>Hospital location/teaching status</b> |                           |                           |                               |                          |
| Urban teaching                           | ref                       | ref                       | ref                           |                          |
| Urban nonteaching                        | 1.63 (0.87, 3.04)         | 1.67 (0.89, 3.12)         | <b>1.31 (1.06, 1.63)</b>      |                          |
| Rural                                    | NA                        | NA                        | 1.03 (0.81, 1.32)             |                          |
| <b>Year admission</b>                    |                           |                           |                               |                          |
| 2005-2010                                | ref                       |                           | ref                           | ref                      |
| 2011-2014                                | 0.83 (0.36, 1.88)         |                           | 0.81 (0.60, 1.10)             | 0.83 (0.61, 1.13)        |
| 2015-2018                                | 1.07 (0.51, 2.24)         |                           | <b>0.57 (0.42, 0.76)</b>      | <b>0.53 (0.39, 0.71)</b> |

<sup>a</sup> Excluded patients with in-hospital mortality. <sup>b</sup> LOS > 9 days. Significant values are shown in bold. LOS, length of stay; HMO, Health Maintenance Organization; CCI, Charlson Comorbidity Index; OR, odds ratio; aOR, adjusted OR. NA: not applicable, no event occurred in the category.

**Supplementary Table S2.** Associations between study variables and postoperative complications.  
(cont.).

|                                          | Complications (any)      |                          | Bleeding                 |                          | Pneumonia                |                          |
|------------------------------------------|--------------------------|--------------------------|--------------------------|--------------------------|--------------------------|--------------------------|
|                                          | Univariable              | Multivariable            | Univariable              | Multivariable            | Univariable              | Multivariable            |
|                                          | OR (95% CI)              | aOR (95% CI)             | OR (95% CI)              | aOR (95% CI)             | OR (95% CI)              | aOR (95% CI)             |
| <b>Type of surgery</b>                   |                          |                          |                          |                          |                          |                          |
| Pure laparoscopic                        | ref                      | ref                      | ref                      | ref                      | ref                      | ref                      |
| Robot-assisted                           | 0.99 (0.78, 1.27)        | <b>0.69 (0.54, 0.88)</b> | 1.17 (0.88, 1.57)        | <b>0.73 (0.54, 0.99)</b> | <b>0.48 (0.27, 0.84)</b> | <b>0.49 (0.28, 0.86)</b> |
| <b>Age, years</b>                        |                          |                          |                          |                          |                          |                          |
| 50-59                                    | ref                      | ref                      | ref                      | ref                      | ref                      |                          |
| 60-69                                    | 1.10 (0.85, 1.41)        | 1.02 (0.78, 1.33)        | 1.03 (0.77, 1.38)        | 1.00 (0.72, 1.39)        | 1.15 (0.48, 2.76)        |                          |
| 70-79                                    | 1.28 (1.00, 1.64)        | 1.05 (0.79, 1.39)        | 1.31 (0.99, 1.74)        | 1.18 (0.84, 1.65)        | 1.41 (0.61, 3.24)        |                          |
| 80+                                      | <b>1.64 (1.23, 2.19)</b> | 1.23 (0.88, 1.72)        | <b>1.51 (1.07, 2.13)</b> | 1.18 (0.79, 1.78)        | 2.24 (0.93, 5.43)        |                          |
| <b>Sex</b>                               |                          |                          |                          |                          |                          |                          |
| Male                                     | 0.95 (0.79, 1.14)        |                          | 0.84 (0.69, 1.03)        |                          | 0.83 (0.48, 1.44)        |                          |
| Female                                   | ref                      |                          | ref                      |                          | ref                      |                          |
| <b>Race</b>                              |                          |                          |                          |                          |                          |                          |
| White                                    | ref                      |                          | ref                      |                          | ref                      | ref                      |
| Black                                    | 0.85 (0.60, 1.20)        |                          | 0.85 (0.56, 1.27)        |                          | 1.20 (0.44, 3.23)        | 1.10 (0.41, 2.96)        |
| Hispanic                                 | 1.01 (0.68, 1.51)        |                          | 0.87 (0.53, 1.42)        |                          | 1.00 (0.24, 4.14)        | 0.98 (0.23, 4.09)        |
| Others                                   | 0.68 (0.44, 1.06)        |                          | 0.98 (0.62, 1.55)        |                          | NA                       | NA                       |
| <b>Household income</b>                  |                          |                          |                          |                          |                          |                          |
| Quartile1                                | 0.86 (0.68, 1.08)        |                          | 0.93 (0.72, 1.20)        |                          | 1.60 (0.83, 3.09)        |                          |
| Quartile2                                | 0.89 (0.72, 1.09)        |                          | 0.87 (0.68, 1.12)        |                          | 1.21 (0.62, 2.34)        |                          |
| Quartile3                                | 0.95 (0.78, 1.15)        |                          | 0.96 (0.77, 1.20)        |                          | 0.95 (0.48, 1.91)        |                          |
| Quartile4                                | ref                      |                          | ref                      |                          | ref                      |                          |
| <b>Insurance status</b>                  |                          |                          |                          |                          |                          |                          |
| Medicare/Medicaid                        | ref                      | ref                      | ref                      | ref                      | ref                      | ref                      |
| Private including HMO                    | <b>0.70 (0.59, 0.83)</b> | <b>0.76 (0.61, 0.93)</b> | <b>0.71 (0.58, 0.86)</b> | <b>0.77 (0.61, 0.97)</b> | <b>0.37 (0.19, 0.75)</b> | <b>0.50 (0.26, 0.96)</b> |
| Self-pay/no-charge/other                 | 0.97 (0.64, 1.48)        | 0.96 (0.63, 1.46)        | 0.96 (0.61, 1.52)        | 0.93 (0.58, 1.48)        | 0.73 (0.23, 2.35)        | 0.50 (0.07, 3.70)        |
| <b>CCI</b>                               |                          |                          |                          |                          |                          |                          |
| 0-1                                      | NA                       | NA                       | NA                       | NA                       | NA                       | NA                       |
| 2-3                                      | ref                      | ref                      | ref                      | ref                      | ref                      | ref                      |
| 4-5                                      | <b>1.69 (1.42, 2.02)</b> | <b>1.82 (1.51, 2.20)</b> | <b>1.42 (1.17, 1.73)</b> | <b>1.53 (1.24, 1.90)</b> | <b>2.02 (1.21, 3.37)</b> | 1.40 (0.79, 2.48)        |
| 6                                        | <b>1.40 (1.04, 1.86)</b> | <b>1.69 (1.25, 2.29)</b> | 1.18 (0.85, 1.65)        | <b>1.53 (1.07, 2.18)</b> | <b>2.56 (1.25, 5.23)</b> | 1.97 (0.93, 4.19)        |
| <b>Hospital bed size</b>                 |                          |                          |                          |                          |                          |                          |
| Large                                    | ref                      |                          | ref                      | ref                      | ref                      |                          |
| Medium                                   | 0.83 (0.68, 1.01)        |                          | <b>0.74 (0.59, 0.94)</b> | 0.90 (0.71, 1.15)        | 1.16 (0.67, 2.01)        |                          |
| Small                                    | 0.87 (0.70, 1.10)        |                          | 0.91 (0.70, 1.19)        | <b>0.77 (0.59, 0.99)</b> | 0.90 (0.45, 1.80)        |                          |
| <b>Hospital location/teaching status</b> |                          |                          |                          |                          |                          |                          |
| Urban teaching                           | ref                      | ref                      | ref                      | ref                      | ref                      |                          |
| Urban nonteaching                        | <b>1.73 (1.41, 2.11)</b> | <b>1.42 (1.15, 1.75)</b> | <b>1.71 (1.33, 2.19)</b> | <b>1.33 (1.03, 1.72)</b> | 0.82 (0.43, 1.56)        |                          |
| Rural                                    | <b>1.14 (1.04, 1.26)</b> | <b>1.21 (1.09, 1.35)</b> | <b>1.37 (1.23, 1.54)</b> | <b>1.39 (1.19, 1.63)</b> | 1.15 (0.89, 1.47)        |                          |
| <b>Year admission</b>                    |                          |                          |                          |                          |                          |                          |
| 2005-2010                                | ref                      | ref                      | ref                      | ref                      | ref                      |                          |
| 2011-2014                                | 0.93 (0.72, 1.19)        | 0.94 (0.72, 1.22)        | 0.83 (0.64, 1.08)        | 0.83 (0.63, 1.09)        | 0.57 (0.28, 1.13)        |                          |
| 2015-2018                                | <b>0.21 (0.16, 0.27)</b> | <b>0.20 (0.15, 0.26)</b> | <b>0.10 (0.07, 0.14)</b> | <b>0.09 (0.07, 0.13)</b> | 0.69 (0.37, 1.29)        |                          |

Significant values are shown in bold. HMO, Health Maintenance Organization; CCI, Charlson Comorbidity Index; OR, odds ratio; aOR, adjusted OR. NA: not applicable, no event occurred in the category.

**Supplementary Table S3.** Associations between study variables and postoperative complications.

|                                          | Infection                |                          | Wound complications      |                          | Sepsis                   |                          |
|------------------------------------------|--------------------------|--------------------------|--------------------------|--------------------------|--------------------------|--------------------------|
|                                          | Univariable              | Multivariable            | Univariable              | Multivariable            | Univariable              | Multivariable            |
|                                          | OR (95% CI)              | aOR (95% CI)             | OR (95% CI)              | aOR (95% CI)             | OR (95% CI)              | aOR (95% CI)             |
| <b>Type of surgery</b>                   |                          |                          |                          |                          |                          |                          |
| Pure laparoscopic                        | ref                      | ref                      | ref                      | ref                      | ref                      | ref                      |
| Robot-assisted                           | 0.81 (0.54, 1.22)        | <b>0.55 (0.36, 0.85)</b> | <b>0.47 (0.30, 0.72)</b> | <b>0.33 (0.20, 0.54)</b> | <b>0.48 (0.34, 0.67)</b> | <b>0.49 (0.34, 0.69)</b> |
| <b>Age, years</b>                        |                          |                          |                          |                          |                          |                          |
| 50-59                                    | ref                      |                          | ref                      |                          | ref                      | ref                      |
| 60-69                                    | 1.34 (0.89, 2.03)        |                          | <b>0.57 (0.34, 0.93)</b> |                          | 1.27 (0.80, 2.03)        | 1.14 (0.69, 1.89)        |
| 70-79                                    | 1.20 (0.78, 1.85)        |                          | 0.87 (0.53, 1.42)        |                          | <b>1.62 (1.03, 2.56)</b> | 1.34 (0.79, 2.27)        |
| 80+                                      | <b>1.60 (1.01, 2.53)</b> |                          | 1.01 (0.56, 1.84)        |                          | <b>2.12 (1.31, 3.45)</b> | 1.70 (0.97, 2.97)        |
| <b>Sex</b>                               |                          |                          |                          |                          |                          |                          |
| Male                                     | 1.08 (0.78, 1.47)        |                          | 1.16 (0.73, 1.85)        |                          | 1.04 (0.75, 1.43)        |                          |
| Female                                   | ref                      |                          | ref                      |                          | ref                      |                          |
| <b>Race</b>                              |                          |                          |                          |                          |                          |                          |
| White                                    | ref                      |                          | ref                      |                          | ref                      |                          |
| Black                                    | 1.01 (0.56, 1.81)        |                          | 0.29 (0.07, 1.20)        |                          | 0.89 (0.48, 1.67)        |                          |
| Hispanic                                 | 1.20 (0.63, 2.30)        |                          | 1.02 (0.37, 2.82)        |                          | 1.44 (0.78, 2.65)        |                          |
| Others                                   | 0.59 (0.29, 1.20)        |                          | 0.66 (0.24, 1.80)        |                          | 0.55 (0.24, 1.25)        |                          |
| <b>Household income</b>                  |                          |                          |                          |                          |                          |                          |
| Quartile1                                | ref                      |                          | ref                      | ref                      | ref                      | ref                      |
| Quartile2                                | <b>0.62 (0.42, 0.93)</b> |                          | <b>0.50 (0.28, 0.90)</b> | <b>0.48 (0.27, 0.86)</b> | 0.66 (0.44, 1.00)        | <b>0.64 (0.42, 0.96)</b> |
| Quartile3                                | 0.77 (0.56, 1.07)        |                          | 0.90 (0.57, 1.42)        | 0.85 (0.54, 1.36)        | 0.76 (0.54, 1.06)        | <b>0.70 (0.50, 0.98)</b> |
| Quartile4                                | 0.78 (0.57, 1.08)        |                          | <b>0.55 (0.35, 0.87)</b> | <b>0.56 (0.36, 0.89)</b> | <b>0.62 (0.44, 0.87)</b> | <b>0.59 (0.42, 0.83)</b> |
| <b>Insurance status</b>                  |                          |                          |                          |                          |                          |                          |
| Medicare/Medicaid                        | ref                      |                          | ref                      |                          | ref                      | ref                      |
| Private including HMO                    | 0.79 (0.59, 1.05)        |                          | 0.87 (0.60, 1.24)        |                          | <b>0.66 (0.49, 0.89)</b> | 0.88 (0.62, 1.25)        |
| Self-pay/ no-charge/ other               | 1.01 (0.52, 1.94)        |                          | 1.00 (0.41, 2.42)        |                          | 1.25 (0.67, 2.35)        | 1.48 (0.73, 3.00)        |
| <b>CCI</b>                               |                          |                          |                          |                          |                          |                          |
| 0-1                                      |                          |                          |                          |                          |                          |                          |
| 2-3                                      | ref                      | ref                      | ref                      | ref                      | ref                      | ref                      |
| 4-5                                      | <b>1.86 (1.41, 2.46)</b> | <b>2.00 (1.50, 2.66)</b> | <b>1.85 (1.28, 2.68)</b> | <b>1.97 (1.35, 2.87)</b> | <b>2.13 (1.61, 2.82)</b> | <b>1.98 (1.48, 2.65)</b> |
| 6                                        | <b>1.92 (1.28, 2.88)</b> | <b>2.36 (1.54, 3.61)</b> | <b>1.15 (0.57, 2.32)</b> | <b>1.30 (0.63, 2.67)</b> | <b>1.67 (1.06, 2.65)</b> | 1.52 (0.95, 2.43)        |
| <b>Hospital bed size</b>                 |                          |                          |                          |                          |                          |                          |
| Large                                    | ref                      | ref                      | ref                      |                          | ref                      |                          |
| Medium                                   | <b>0.58 (0.41, 0.83)</b> | <b>0.68 (0.47, 0.98)</b> | 0.94 (0.61, 1.43)        |                          | 0.85 (0.62, 1.15)        |                          |
| Small                                    | <b>0.55 (0.34, 0.92)</b> | <b>0.50 (0.31, 0.83)</b> | 0.60 (0.34, 1.07)        |                          | 0.63 (0.40, 1.00)        |                          |
| <b>Hospital location/teaching status</b> |                          |                          |                          |                          |                          |                          |
| Urban teaching                           | ref                      | ref                      | ref                      | ref                      | ref                      | ref                      |
| Urban nonteaching                        | <b>1.49 (1.08, 2.06)</b> | 1.18 (0.85, 1.65)        | 1.52 (0.92, 2.50)        | 1.15 (0.68, 1.93)        | <b>1.69 (1.26, 2.27)</b> | <b>1.65 (1.23, 2.22)</b> |
| Rural                                    | 0.99 (0.85, 1.14)        | 0.86 (0.72, 1.03)        | <b>2.05 (1.67, 2.51)</b> | 1.35 (1.00, 1.82)        | <b>1.97 (1.70, 2.30)</b> | <b>1.73 (1.40, 2.14)</b> |
| <b>Year admission</b>                    |                          |                          |                          |                          |                          |                          |
| 2005-2010                                | ref                      | ref                      | ref                      | ref                      | ref                      |                          |
| 2011-2014                                | 0.99 (0.70, 1.40)        | 0.99 (0.70, 1.40)        | 0.71 (0.44, 1.16)        | 0.77 (0.47, 1.25)        | 1.09 (0.69, 1.73)        |                          |

---

|           |                          |                          |                          |                          |                   |
|-----------|--------------------------|--------------------------|--------------------------|--------------------------|-------------------|
| 2015-2018 | <b>0.19 (0.13, 0.28)</b> | <b>0.17 (0.11, 0.25)</b> | <b>0.22 (0.13, 0.38)</b> | <b>0.20 (0.12, 0.35)</b> | 0.87 (0.56, 1.37) |
|-----------|--------------------------|--------------------------|--------------------------|--------------------------|-------------------|

---

Significant values are shown in bold. HMO, Health Maintenance Organization; CCI, Charlson Comorbidity Index; OR, odds ratio; aOR, adjusted OR.
